# Supplementary material for: TDP1 and TOP1 Modulation in Olaparib-Resistant Cancer Determines the Efficacy of Subsequent Chemotherapy
Source: PubMed Central journal article supplement (PMC7072281; doi:10.3390/cancers12020334), 2020-02-03
Supplement: cancers-12-00334-s001.pdf [file cancers-12-00334-s001.pdf]

# TDP1 and TOP1 Modulation in Olaparib-Resistant Cancer Determines the Efficacy of Subsequent Chemotherapy

Jin Won Kim, Ahrum Min, Seock-Ah Im, Hyemin Jang, Yu Jin Kim, Hee-Jun Kim, Kyung-Hun Lee, Tae-Yong Kim, Keun Wook Lee, Do-Youn Oh, Jee-Hyun Kim and Yung-Jue Bang

Supplementary Figure S1

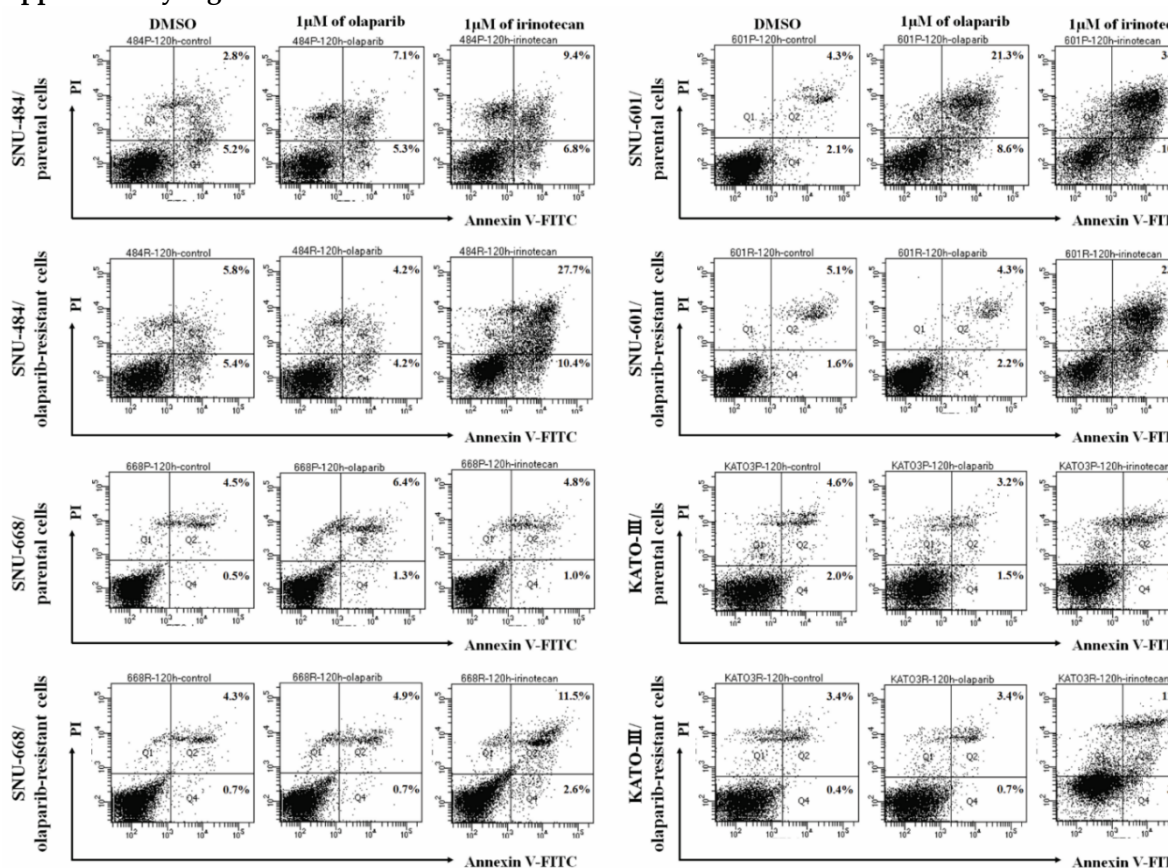

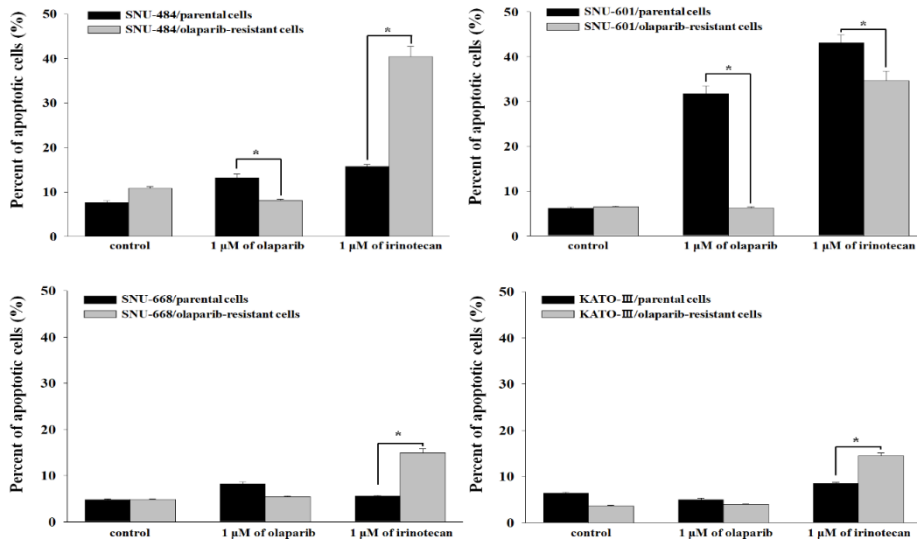

**Figure S1.** The populations of apoptotic cells following irinotecan or olaparib treatment. The percent of apoptotic cells were analyzed by performing Annexin V assay. The population of Annexin and PI dual positive cells were calculated and presented in a bar graph with SEs (n = 3), \* p < 0.005.

**Supplementary Figure S2**

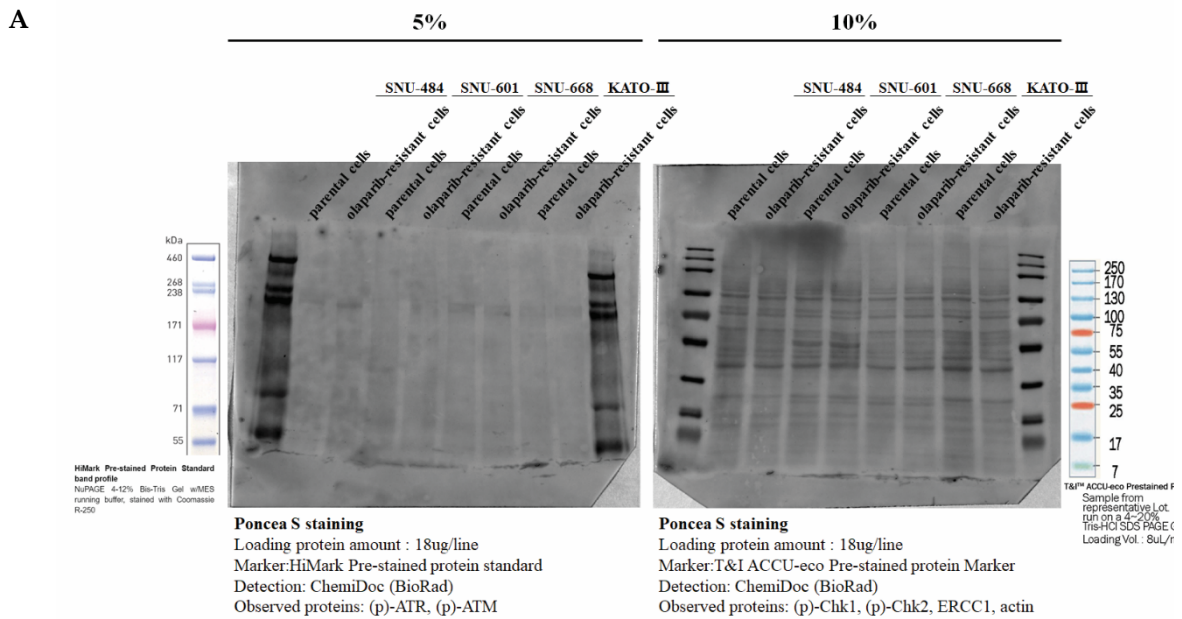

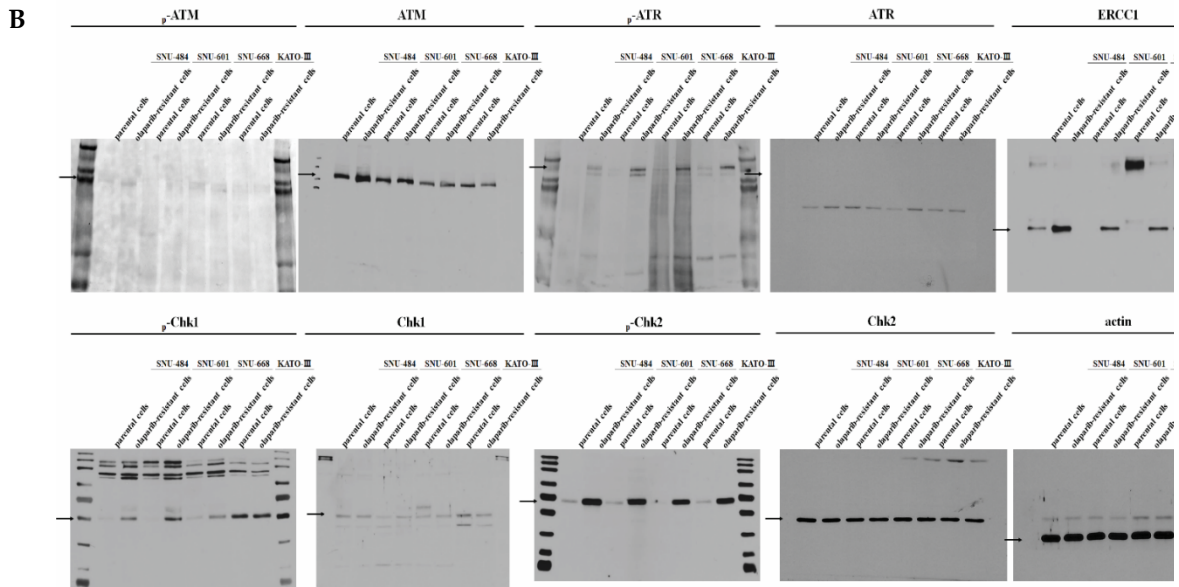

**Figure S2.** Protein expression levels of parental and olaparib-resistant cells. (A) Whole protein staining with Ponceau S reveals different expression levels of DDR molecules in parental and olaparib-resistant gastric cancer cells. (B) The basal expression levels of DDR proteins were detected in uncropped blots.

**Supplementary Table S1.** Sequences of the siRNAs.

| gene         | target sequence (5' → 3')                                                          |
|--------------|------------------------------------------------------------------------------------|
| non-specific | 5'-AATTCTCCGAACGTGTCACG-3'<br>5'-GGGAAGGACTCCATCAGATACTATA-3'                      |
| TOP1         | 5'-AAGTGGAATGGTGGGAAGAA-3'<br>5'-CGAAGAAGGTAGTAGAGTC-3'                            |
| TDP1         | 5'-GACCATATCTAGTAGTGAT-3'<br>5'-GGAGTTAAGCCAAAGTATA-3'<br>5'-CTAGACAGTTTCAAAGTG-3' |
